# Supplementary material for: The Autism Impact Measure (AIM): Meaningful Change Thresholds and Core Symptom Changes Over One Year from an Online Survey in the U.S.
Source: Springer Nature journal article supplement (doi:10.1007/s10803-022-05635-7), 2022-07-04
Supplement: MOESM1 [file 23238452]

## Supplementary appendix

Supplement to:

Autism Impact Measure: Meaningful Change Thresholds and Core Symptom Changes Over One Year  
from an Online Survey in the U.S.

Mariabeth Silkey, Gonzalo Durán-Pacheco, Michelle Johnson, Chuang Liu, Susanne Clinch, Kiely Law,  
and Georg Loss

*Journal of Autism and Developmental Disorders*

**Corresponding author:** Michelle Johnson, Roche Products Ltd.

E-mail: michelle.johnson.mj2@roche.com

### Contents

Additional methods

Page 2

Tables S1–S10

Pages 3–14

Figures S1–S8

Pages 15–22

## Additional Methods

### *Handling of missing data*

The digital questionnaire was designed to minimize the extent of missing data by limiting the selection of answers using drop-down menus; including “I don’t know” and “I prefer not to answer” for sensitive questions. Skip pattern mechanisms were used in hierarchical questions, which automatically registered “not applicable” for skipped questions. Questions answered in the survey would automatically proceed to the next appropriate question. Partially answered sections of the survey were automatically saved. Respondents of incomplete questionnaires received up to three email reminders, including a link to the survey to complete their responses.

### *Sample size considerations*

Of 4,966 participants in the baseline study with AIM sufficiently completed, a response rate of 70% was expected for the follow-up study, equating to an expected sample size of 3,476 participants. CIR is commonly estimated as one-fifth the standard deviation (Fayers & Hays, 2014). At baseline (Monz et al., 2019), a standard deviation of 54.1 on total AIM score was observed, leading to an estimated CIR threshold of 10.8 ( $=0.2*54.1$ ).

## References

- Fayers, P. M., & Hays, R. D. (2014). Don't middle your MIDs: regression to the mean shrinks estimates of minimally important differences. *Quality of Life Research, 23*(1), 1–4. <https://doi.org/10.1007/s11136-013-0443-4>
- Monz, B. U., Houghton, R., Law, K., & Loss, G. (2019). Treatment patterns in children with autism in the United States. *Autism Research, 12*(3), 517–526. <https://doi.org/10.1002/aur.2070>

**Table S1** Additional baseline characteristics of the analysis population

| Parameter                                                         | Overall<br>(n=2,761) | Participants<br>reporting IQ<br>(n=1,078) | Overall vs. group<br>reporting IQ score<br><i>p</i> -value |
|-------------------------------------------------------------------|----------------------|-------------------------------------------|------------------------------------------------------------|
| <b>Caregiver &amp; Household</b>                                  |                      |                                           |                                                            |
| <i>Marital status</i>                                             |                      |                                           | 0.4817 <sup>a</sup>                                        |
| Single and never married                                          | 184 (6.7)            | 66 (6.2)                                  |                                                            |
| Married                                                           | 2,021 (73.7)         | 794 (74.1)                                |                                                            |
| Living with partner                                               | 169 (6.2)            | 51 (4.8)                                  |                                                            |
| Separated                                                         | 77 (2.8)             | 34 (3.2)                                  |                                                            |
| Divorced                                                          | 274 (10.0)           | 116 (10.8)                                |                                                            |
| Widowed                                                           | 19 (0.7)             | 10 (0.9)                                  |                                                            |
| Prefer not to answer                                              | 17                   | 7                                         |                                                            |
| <i>Employment</i>                                                 |                      |                                           | 0.6430 <sup>a</sup>                                        |
| Work ≥35 hours per week                                           | 1,182 (42.9)         | 489 (45.5)                                |                                                            |
| Work <35 hours per week                                           | 506 (18.4)           | 196 (18.2)                                |                                                            |
| Full-time homemaker                                               | 827 (30.0)           | 301 (28.0)                                |                                                            |
| Retired                                                           | 19 (0.7)             | 7 (0.7)                                   |                                                            |
| Student                                                           | 69 (2.5)             | 27 (2.5)                                  |                                                            |
| Unemployed                                                        | 82 (3.0)             | 24 (2.2)                                  |                                                            |
| Other                                                             | 69 (2.5)             | 31 (2.9)                                  |                                                            |
| Prefer not to answer                                              | 7                    | 3                                         |                                                            |
| <i>Total household income in USD</i>                              |                      |                                           | 0.0124 <sup>a</sup>                                        |
| <\$50,000                                                         | 1,018 (38.4)         | 353 (34.0)                                |                                                            |
| \$50,000–\$99,999                                                 | 900 (33.9)           | 352 (33.9)                                |                                                            |
| ≥\$100,000                                                        | 735 (27.7)           | 333 (32.1)                                |                                                            |
| Prefer not to answer                                              | 107                  | 40                                        |                                                            |
| Missing                                                           | 1                    | 0                                         |                                                            |
| <i>Household size including caregiver and child with ASD</i>      |                      |                                           | 0.8106 <sup>a</sup>                                        |
| <4                                                                | 789 (28.6)           | 319 (29.7)                                |                                                            |
| 4.0                                                               | 1,072 (38.9)         | 412 (38.3)                                |                                                            |
| ≥5                                                                | 896 (32.5)           | 344 (32.0)                                |                                                            |
| Prefer not to answer                                              | 4                    | 3                                         |                                                            |
| <b>Child with ASD</b>                                             |                      |                                           |                                                            |
| <i>Age group, years</i>                                           |                      |                                           | <0.0001 <sup>a</sup>                                       |
| 4                                                                 | 149 (5.4)            | 21 (2.0)                                  |                                                            |
| 5–9                                                               | 1,287 (46.7)         | 353 (32.8)                                |                                                            |
| 10–14                                                             | 918 (33.3)           | 483 (44.9)                                |                                                            |
| 15–17                                                             | 402 (14.6)           | 218 (20.3)                                |                                                            |
| Missing                                                           | 5                    | 3                                         |                                                            |
| <i>Child eloped</i>                                               |                      |                                           | 0.3359 <sup>a</sup>                                        |
| Yes                                                               | 649 (23.6)           | 238 (22.1)                                |                                                            |
| No                                                                | 2,104 (76.4)         | 837 (77.9)                                |                                                            |
| Don't know/Prefer not to answer                                   | 8                    | 3                                         |                                                            |
| <i>Child hospitalized for mental health care</i>                  |                      |                                           | 0.0789 <sup>a</sup>                                        |
| Yes                                                               | 63 (2.3)             | 36 (3.4)                                  |                                                            |
| No                                                                | 2,687 (97.7)         | 1,035 (96.7)                              |                                                            |
| Missing                                                           | 11                   | 7                                         |                                                            |
| <i>Child seen in emergency room for mental health care</i>        |                      |                                           | 0.0394 <sup>a</sup>                                        |
| Yes                                                               | 110 (4.0)            | 60 (5.8)                                  |                                                            |
| No                                                                | 2,646 (96.0)         | 1,015 (94.4)                              |                                                            |
| Missing                                                           | 5                    | 3                                         |                                                            |
| <i>Child suspended or expelled from school</i>                    |                      |                                           | 0.0791 <sup>a</sup>                                        |
| Yes                                                               | 161 (5.8)            | 80 (7.4)                                  |                                                            |
| No                                                                | 2,594 (94.2)         | 995 (92.6)                                |                                                            |
| Missing                                                           | 6                    | 3                                         |                                                            |
| <i>Child attended school with special education students only</i> |                      |                                           | 0.0156 <sup>a</sup>                                        |
| Yes                                                               | 2,206 (80.3)         | 901 (83.7)                                |                                                            |
| No                                                                | 542 (19.7)           | 175 (16.3)                                |                                                            |

| Parameter                                                                                                             | Overall<br>(n=2,761) | Participants<br>reporting IQ<br>(n=1,078) | Overall vs. group<br>reporting IQ score<br>p-value |
|-----------------------------------------------------------------------------------------------------------------------|----------------------|-------------------------------------------|----------------------------------------------------|
| Missing/Don't know                                                                                                    | 13                   | 2                                         |                                                    |
| Of children who attended school with typically developing peers (n=2,206; n= 901),<br>percent time attended class     |                      |                                           | 0.0553 <sup>a</sup>                                |
| >60%                                                                                                                  | 1,288 (60.4)         | 563 (64.0)                                |                                                    |
| 30%–60%                                                                                                               | 321 (15.1)           | 136 (15.4)                                |                                                    |
| <30%                                                                                                                  | 523 (24.5)           | 180 (20.5)                                |                                                    |
| Don't know                                                                                                            | 73                   | 22                                        |                                                    |
| Missing                                                                                                               | 1                    | 0                                         |                                                    |
| Prescription medication (any)                                                                                         |                      |                                           | <0.0001 <sup>a</sup>                               |
| Yes                                                                                                                   | 1,430 (51.9)         | 672 (62.6)                                |                                                    |
| No                                                                                                                    | 1,324 (48.1)         | 401 (37.4)                                |                                                    |
| Don't know                                                                                                            | 1                    | 0                                         |                                                    |
| Missing                                                                                                               | 6                    | 5                                         |                                                    |
| Of those reported taking prescription medication (n =1,420; n= 672),<br>medication was for ASD symptoms and behaviors |                      |                                           | 0.0574 <sup>a</sup>                                |
| Yes                                                                                                                   | 898 (64.0)           | 454 (68.4)                                |                                                    |
| No                                                                                                                    | 505 (36.0)           | 210 (31.6)                                |                                                    |
| Don't know                                                                                                            | 24                   | 7                                         |                                                    |
| Missing                                                                                                               | 3                    | 1                                         |                                                    |
| IQ test ever given                                                                                                    |                      |                                           |                                                    |
| Yes                                                                                                                   | 1,220 (51.5)         | 991 (93.2)                                |                                                    |
| No                                                                                                                    | 1,147 (48.5)         | 72 (6.8)                                  |                                                    |
| Don't know                                                                                                            | 393                  | 15                                        |                                                    |
| Missing                                                                                                               | 1                    | 0                                         |                                                    |
| Of children with IQ scores reported (n=1,078), reported baseline IQ score ≤70                                         |                      |                                           |                                                    |
| Yes                                                                                                                   | 280                  | 280 (26.0)                                |                                                    |
| No                                                                                                                    | 798                  | 798 (74.0)                                |                                                    |
| Metropolitan statistical area                                                                                         |                      |                                           | 0.6870 <sup>a</sup>                                |
| Macropolitan                                                                                                          | 2,244 (87.3)         | 877 (86.7)                                |                                                    |
| Micropolitan                                                                                                          | 326 (12.7)           | 134 (13.3)                                |                                                    |
| Missing                                                                                                               | 191                  | 67                                        |                                                    |
| Time since diagnosis                                                                                                  |                      |                                           | <0.0001 <sup>b</sup>                               |
| Mean (SD)                                                                                                             | 5.4 (3.5)            | 6.1 (3.8)                                 |                                                    |
| Missing                                                                                                               | 7                    | 4                                         |                                                    |
| Total AIM score at baseline<br>Mean (SD)                                                                              | 221.4 (53.8)         | 217.6 (53.3)                              | 0.0501 <sup>b</sup>                                |

<sup>a</sup>The chi-square test was used to compare the distribution of categorical variables between the subset of children for whom an IQ score was known, and the overall group

<sup>b</sup>Continuous variables between the two groups were compared using the t-test

*Note.* Numbers indicate n (%); percent denominators do not include counts of Missing/Don't know/Prefer not to answer.

Abbreviations: *AIM* Autism Impact Measure, *ASD* autism spectrum disorder, *IQ* intelligence quotient, *SD* standard deviation, *USD* United States Dollar

**Table S2** Factors associated with AIM change scores

| Variable                                                  | Estimate (95% CI)       | p-value |
|-----------------------------------------------------------|-------------------------|---------|
| Intercept                                                 | -0.87 (-12.08, 10.34)   | 0.8794  |
| <b>Child with ASD</b>                                     |                         |         |
| Age (centered around mean)                                | -0.40 (-0.95, 0.16)     | 0.1597  |
| Gender (reference female)                                 |                         |         |
| Child is male                                             | -1.51 (-4.44, 1.42)     | 0.3117  |
| Total AIM score at baseline (centered and scaled)         | -12.25 (-13.55, -10.95) | <0.0001 |
| Race (reference Non-white/Hispanic)                       |                         |         |
| Non-white/Non-Hispanic                                    | -1.28 (-7.20, 4.64)     | 0.6720  |
| White/Hispanic                                            | 0.19 (-6.10, 6.48)      | 0.9531  |
| White/Non-Hispanic                                        | 0.18 (-5.18, 5.54)      | 0.9475  |
| Child is verbal                                           | -12.13 (-15.88, -8.37)  | <0.0001 |
| Child has eloped or strayed                               | 11.22 (8.27, 14.16)     | <0.0001 |
| Child has other (unspecified) mental health comorbidities | -0.89 (-3.63, 1.86)     | 0.5272  |
| Child has been hospitalized for mental health care        | -0.88 (-10.92, 9.16)    | 0.8635  |
| Child has been seen in ER for mental health care          | 2.15 (-5.59, 9.89)      | 0.5863  |
| Child suspended or expelled from school                   | -1.64 (-6.85, 3.58)     | 0.5387  |
| Years since diagnosis                                     | 0.57 (0.06, 1.08)       | 0.0292  |
| Child takes (any) drug for ASD                            | 1.35 (-1.33, 4.03)      | 0.3247  |
| <b>Caregiver &amp; Household</b>                          |                         |         |
| Caregiver age                                             | -0.06 (-0.26, 0.15)     | 0.5970  |
| Household Income (reference <\$50,000)                    |                         |         |
| \$50,000–\$99,999                                         | -3.52 (-6.42, -0.62)    | 0.0176  |
| ≥\$100,000                                                | -1.88 (-5.16, 1.42)     | 0.2638  |
| Prefer not to answer                                      | -8.85 (-15.24, -2.47)   | 0.0066  |
| Household size (reference size <4)                        |                         |         |
| Household size: 4                                         | -1.05 (-4.00, 1.90)     | 0.4860  |
| Household size: ≥5                                        | 1.65 (-1.42, 4.73)      | 0.2924  |
| U.S. region (reference region West)                       |                         |         |
| South                                                     | -1.70 (-4.80, 1.39)     | 0.2804  |
| Midwest                                                   | -2.72 (-6.20, 0.76)     | 0.1256  |
| Northeast                                                 | -1.86 (-5.69, 1.96)     | 0.3401  |
| Metropolitan service area (reference macropolitan)        |                         |         |
| Micropolitan                                              | -2.04 (-5.78, 1.71)     | 0.2858  |
| Unknown                                                   | -0.61 (-5.33, 4.11)     | 0.7998  |

Note. All factors listed in the table were included in the multivariable model for AIM score change. P-values arrived at by applying the t-test to coefficient estimates.

Abbreviations: AIM Autism Impact Measure, ASD autism spectrum disorder, CI confidence interval, ER emergency room

**Table S3** Factors associated with a primary anchor meaningful change threshold response for improvement on total AIM

| Variable                                                  | Odds ratio (95% CI) | p-value |
|-----------------------------------------------------------|---------------------|---------|
| Intercept                                                 | 0.66 (0.31, 1.44)   | 0.2994  |
| <b>Child with ASD</b>                                     |                     |         |
| Age (centered around mean)                                | 1.01 (0.98, 1.05)   | 0.4766  |
| Child is male                                             | 1.08 (0.89, 1.32)   | 0.4331  |
| Total AIM score at baseline (centered and scaled)         | 1.75 (1.59, 1.92)   | <0.0001 |
| Race (reference Non-white/Hispanic)                       |                     |         |
| Non-white/Non-Hispanic                                    | 1.07 (0.71, 1.62)   | 0.7307  |
| White/Hispanic                                            | 0.99 (0.64, 1.53)   | 0.9799  |
| White/Non-Hispanic                                        | 0.94 (0.65, 1.36)   | 0.7570  |
| Child is verbal                                           | 2.19 (1.69, 2.83)   | <0.0001 |
| Child has eloped or strayed                               | 0.59 (0.48, 0.72)   | <0.0001 |
| Child has other (unspecified) mental health comorbidities | 1.06 (0.88, 1.28)   | 0.5619  |
| Child has been hospitalized for mental health care        | 0.99 (0.49, 2.02)   | 0.9751  |
| Child has been seen in ER for mental health care          | 1.09 (0.64, 1.91)   | 0.7512  |
| Child suspended or expelled from school                   | 1.11 (0.77, 1.60)   | 0.5775  |
| Years since diagnosis                                     | 0.98 (0.94, 1.01)   | 0.1860  |
| Child takes (any) drug for ASD                            | 0.94 (0.78, 1.13)   | 0.5101  |
| <b>Caregiver &amp; Household</b>                          |                     |         |
| Caregiver age                                             | 1.00 (0.99, 1.01)   | 0.9186  |
| Household Income (reference <\$50,000)                    |                     |         |
| \$50,000–\$99,999                                         | 1.28 (1.04, 1.56)   | 0.0172  |
| ≥\$100,000                                                | 1.16 (0.92, 1.45)   | 0.2060  |
| Prefer not to answer                                      | 1.68 (1.07, 2.69)   | 0.0259  |
| Household size (reference size <4)                        |                     |         |
| Household size: 4                                         | 1.05 (0.86, 1.29)   | 0.6439  |
| Household size: ≥5                                        | 1.05 (0.85, 1.30)   | 0.6577  |
| U.S. region (reference region West)                       |                     |         |
| South                                                     | 1.18 (0.95, 1.46)   | 0.1263  |
| Midwest                                                   | 1.33 (1.05, 1.69)   | 0.0200  |
| Northeast                                                 | 1.13 (0.87, 1.47)   | 0.3503  |
| Metropolitan service area (reference macropolitan)        |                     |         |
| Micropolitan                                              | 0.97 (0.75, 1.26)   | 0.8245  |
| Unknown                                                   | 0.94 (0.68, 1.31)   | 0.7307  |

*Note.* All factors listed in the table were included in the multivariable model for clinically important responder for improvement. *P*-values arrived at by applying the t-test to coefficient estimates.

Abbreviations: *AIM* Autism Impact Measure, *ASD* autism spectrum disorder, *CI* confidence interval, *ER* emergency room

**Table S4** Factors associated with a primary anchor meaningful change threshold response for deterioration on total AIM

| Variable                                                  | Odds ratio (95% CI) | p-value |
|-----------------------------------------------------------|---------------------|---------|
| Intercept                                                 | 0.73 (0.29, 1.79)   | 0.4858  |
| <b>Child with ASD</b>                                     |                     |         |
| Age (centered around mean)                                | 0.94 (0.90, 0.99)   | 0.0100  |
| Child is male                                             | 0.89 (0.71, 1.12)   | 0.3163  |
| Total AIM score at baseline (centered and scaled)         | 0.53 (0.47, 0.59)   | <0.0001 |
| Race (reference Non-white/Hispanic)                       |                     |         |
| Non-white/Non-Hispanic                                    | 1.19 (0.74, 1.95)   | 0.4722  |
| White/Hispanic                                            | 1.01 (0.61, 1.71)   | 0.9549  |
| White/Non-Hispanic                                        | 1.19 (0.78, 1.87)   | 0.4344  |
| Child is verbal                                           | 0.53 (0.40, 0.72)   | <0.0001 |
| Child has eloped or strayed                               | 1.87 (1.49, 2.36)   | <0.0001 |
| Child has other (unspecified) mental health comorbidities | 0.98 (0.79, 1.23)   | 0.8710  |
| Child has been hospitalized for mental health care        | 0.97 (0.39, 2.32)   | 0.9475  |
| Child has been seen in ER for mental health care          | 0.88 (0.43, 1.69)   | 0.7114  |
| Child suspended or expelled from school                   | 0.84 (0.53, 1.28)   | 0.4311  |
| Years since diagnosis                                     | 1.05 (1.00, 1.09)   | 0.0395  |
| Child takes (any) drug for ASD                            | 1.06 (0.85, 1.32)   | 0.5968  |
| <b>Caregiver &amp; Household</b>                          |                     |         |
| Caregiver age                                             | 0.99 (0.97, 1.00)   | 0.1568  |
| Household Income (reference <\$50,000)                    |                     |         |
| \$50,000–\$99,999                                         | 0.75 (0.59, 0.95)   | 0.0166  |
| ≥\$100,000                                                | 0.75 (0.58, 0.98)   | 0.0345  |
| Prefer not to answer                                      | 0.37 (0.19, 0.68)   | 0.0026  |
| Household size (reference size <4)                        |                     |         |
| Household size: 4                                         | 0.85 (0.67, 1.08)   | 0.1721  |
| Household size: ≥5                                        | 0.91 (0.71, 1.16)   | 0.4532  |
| U.S. region (reference region West)                       |                     |         |
| South                                                     | 0.86 (0.68, 1.10)   | 0.2428  |
| Midwest                                                   | 0.77 (0.58, 1.02)   | 0.0650  |
| Northeast                                                 | 0.82 (0.61, 1.12)   | 0.2165  |
| Metropolitan service area (reference macropolitan)        |                     |         |
| Micropolitan                                              | 1.08 (0.80, 1.44)   | 0.6152  |
| Unknown                                                   | 0.96 (0.65, 1.40)   | 0.8403  |

*Note.* All factors listed in the table were included in the multivariable model for clinically important responder for deterioration. *P*-values arrived at by applying the t-test to coefficient estimates.

Abbreviations: *AIM* Autism Impact Measure, *ASD* autism spectrum disorder, *CI* confidence interval, *ER* emergency room

**Table S5.** Meaningful change thresholds for children with IQ data (change and percent change from baseline)

|                                                                            | Meaningful change threshold of improvement |                                  | Meaningful change threshold of deterioration |                                    |
|----------------------------------------------------------------------------|--------------------------------------------|----------------------------------|----------------------------------------------|------------------------------------|
| Parameter                                                                  | Improvement threshold (95% CI)             | % Improvement threshold (95% CI) | Deterioration threshold (95% CI)             | % Deterioration threshold (95% CI) |
| <b>Children without cognitive impairment</b>                               |                                            |                                  |                                              |                                    |
| <b>Primary anchor: caregiver impression of change in overall ASD</b>       |                                            |                                  |                                              |                                    |
| Total AIM                                                                  | -3.62 (-8.82, 1.58)                        | -2.50 (-5.00, 0.10)              | 10.92 (2.60, 19.25)                          | 4.70 (0.61, 8.87)                  |
| AIM Frequency                                                              | -1.85 (-4.40, 0.69)                        | -2.00 (-4.50, 0.50)              | 7.21 (3.14, 11.29)                           | 5.90 (1.87, 9.88)                  |
| AIM Impact                                                                 | -1.77 (-5.06, 1.52)                        | -3.00 (-6.50, 0.50)              | 3.71 (-1.56, 8.97)                           | 3.30 (-2.28, 8.88)                 |
| AIM Repetitive Behavior Domain                                             | -0.18 (-1.66, 1.31)                        | -1.50 (-5.40, 2.40)              | 1.99 (-0.38, 4.36)                           | 5.00 (-1.25, 11.20)                |
| AIM Communication Domain                                                   | -0.35 (-1.32, 0.62)                        | -2.40 (-6.10, 1.30)              | 2.08 (0.53, 3.64)                            | 6.70 (0.76, 12.70)                 |
| AIM Aberrant Behavior Domain                                               | -1.40 (-2.60, -0.20)                       | -4.60 (-8.30, -0.90)             | 2.33 (0.41, 4.25)                            | 6.60 (0.64, 12.59)                 |
| AIM Social Reciprocity Domain                                              | -0.78 (-1.77, 0.21)                        | -2.20 (-6.60, 2.10)              | 0.92 (-0.66, 2.51)                           | 3.10 (-3.81, 10.06)                |
| AIM Peer Interaction Domain                                                | -0.82 (-1.80, 0.17)                        | -3.00 (-8.00, 2.00)              | 0.87 (-0.71, 2.45)                           | 2.50 (-5.52, 10.43)                |
| <b>Secondary anchor: caregiver impression of change in communication</b>   |                                            |                                  |                                              |                                    |
| AIM Communication Domain                                                   | -0.72 (-2.02, 0.58)                        | -2.30 (-7.30, 2.60)              | 2.43 (0.12, 4.74)                            | 10.30 (1.42, 19.15)                |
| <b>Secondary anchor: caregiver impression of change social interaction</b> |                                            |                                  |                                              |                                    |
| AIM Peer Interaction Domain                                                | -0.54 (-1.75, 0.67)                        | -0.90 (-6.20, 4.40)              | 2.32 (0.46, 4.18)                            | 9.00 (0.82, 17.14)                 |
| AIM Social Reciprocity Domain                                              | -1.23 (-2.43, -0.02)                       | -2.60 (-8.70, 3.50)              | 1.55 (-0.30, 3.40)                           | 6.10 (-3.28, 15.51)                |
| <b>Children with cognitive impairment</b>                                  |                                            |                                  |                                              |                                    |
| <b>Primary anchor: caregiver impression of change in overall ASD</b>       |                                            |                                  |                                              |                                    |
| Total AIM                                                                  | -8.00 (-17.99, 2.00)                       | 10.90 (-2.31, 24.18)             | -3.80 (-7.84, 0.20)                          | 4.00 (-1.33, 9.32)                 |
| AIM Frequency                                                              | -2.60 (-6.93, 1.78)                        | 3.60 (-2.13, 9.42)               | -2.60 (-5.91, 0.69)                          | 1.80 (-2.57, 6.19)                 |
| AIM Impact                                                                 | -5.40 (-12.17, 1.33)                       | 7.30 (-1.65, 16.23)              | -4.80 (-10.78, 1.22)                         | 7.20 (-0.71, 15.18)                |
| AIM Repetitive Behavior Domain                                             | 0 (-2.63, 2.64)                            | 2.20 (-1.28, 5.70)               | -0.60 (-6.34, 5.18)                          | 3.70 (-3.94, 11.33)                |
| AIM Communication Domain                                                   | -0.70 (-2.69, 1.25)                        | 2.30 (-0.30, 4.93)               | -2.50 (-8.34, 3.31)                          | 7.40 (-0.33, 15.12)                |
| AIM Aberrant Behavior Domain                                               | 0.10 (-2.17, 2.41)                         | 3.40 (0.35, 6.43)                | -0.40 (-6.65, 5.86)                          | 8.90 (0.66, 17.23)                 |
| AIM Social Reciprocity Domain                                              | -1.40 (-3.17, 0.27)                        | 1.50 (-0.79, 3.77)               | -5.30 (-11.41, 0.90)                         | 6.40 (-1.79, 14.52)                |
| AIM Peer Interaction Domain                                                | -1.10 (-2.75, 0.60)                        | 3.10 (0.86, 5.30)                | -3.40 (-10.43, 3.72)                         | 14.10 (4.76, 23.51)                |
| <b>Secondary anchor: caregiver impression of change in communication</b>   |                                            |                                  |                                              |                                    |
| AIM Communication Domain                                                   | -1.50 (-3.82, 0.91)                        | 4.80 (1.11, 8.46)                | -3.50 (-10.45, 3.53)                         | 16.00 (5.10, 26.82)                |
| <b>Secondary anchor: caregiver impression of change social interaction</b> |                                            |                                  |                                              |                                    |
| AIM Peer Interaction Domain                                                | -1.40 (-3.27, 0.38)                        | 0.60 (-2.07, 3.20)               | -5.60 (-12.08, 0.95)                         | 4.60 (-4.79, 14.05)                |
| AIM Social Reciprocity Domain                                              | -2.90 (-4.62, -1.12)                       | 1.50 (-1.00, 4.05)               | -11.20 (-18.54, -3.79)                       | 8.60 (-2.07, 19.25)                |

Note. Linear-model-based (one degree of freedom) contrasts of AIM change scores comparing: "Improvement" vs. "No change" and "Deterioration" vs. "No change."

"Improvement": CaGI-C overall ASD assessed as "minimally improved", "much improved", or "very much improved."

"Deterioration": CaGI-C overall ASD assessed as "minimally worse", "much worse", or "very much worse."

"No change": CaGI-C overall ASD assessed as "no change."

% Improvement and % Deterioration is % change relative to baseline value.

Abbreviations: AIM Autism Impact Measure, ASD autism spectrum disorder, CaGI-C Caregiver-reported Global Impression of Change survey, CI confidence interval, IQ intelligence quotient



**Table S6** Factors associated with AIM change scores for children with IQ data

| Variable                                                  | Estimate                | p-value |
|-----------------------------------------------------------|-------------------------|---------|
| Intercept                                                 | -27.63 (-46.84, -8.42)  | 0.0049  |
| <b>Child with ASD</b>                                     |                         |         |
| Age (centered around mean)                                | -0.55 (-1.37, 0.28)     | 0.1939  |
| Child is male                                             | 0.50 (-3.97, 4.96)      | 0.8276  |
| Child IQ <70                                              | 9.20 (4.57, 13.83)      | 0.0001  |
| Total AIM score at baseline (centered and scaled)         | -13.39 (-15.48, -11.29) | <0.0001 |
| Race (reference Non-white/Hispanic)                       |                         |         |
| Non-white/Non-Hispanic                                    | 1.34 (-8.88, 11.55)     | 0.7972  |
| White/Hispanic                                            | 1.00 (-10.06, 12.06)    | 0.8591  |
| White/Non-Hispanic                                        | 5.95 (-3.41, 15.31)     | 0.2122  |
| Child is verbal                                           | -12.27 (-20.82, -3.73)  | 0.0049  |
| Child has eloped or strayed                               | 11.06 (6.30, 15.81)     | <0.0001 |
| Child has other (unspecified) mental health comorbidities | 0.17 (-3.99, 4.34)      | 0.9345  |
| Child has been hospitalized for mental health care        | -5.04 (-19.40, 9.33)    | 0.4917  |
| Child has been seen in ER for mental health care          | 6.46 (-4.78, 17.70)     | 0.2600  |
| Child suspended or expelled from school                   | -0.87 (-8.03, 6.28)     | 0.8105  |
| Years since diagnosis                                     | 0.56 (-0.13, 1.25)      | 0.1121  |
| Child takes (any) drug for ASD                            | 1.09 (-3.07, 5.25)      | 0.6073  |
| <b>Caregiver &amp; Household</b>                          |                         |         |
| Caregiver age                                             | 0.27 (-0.05, 0.59)      | 0.1032  |
| Household Income (reference <\$50,000)                    |                         |         |
| \$50,000–\$99,999                                         | -3.12 (-7.71, 1.47)     | 0.1827  |
| ≥\$100,000                                                | -4.50 (-9.56, 0.57)     | 0.0821  |
| Prefer not to answer                                      | -9.04 (-19.00, 0.93)    | 0.0754  |
| Household size (reference size <4)                        |                         |         |
| Household size: 4                                         | 0.73 (-3.87, 5.33)      | 0.7556  |
| Household size: ≥5                                        | 4.49 (-0.31, 9.28)      | 0.0667  |
| U.S. region (reference region West)                       |                         |         |
| South                                                     | 3.09 (-1.96, 8.13)      | 0.2302  |
| Midwest                                                   | -1.95 (-7.56, 3.66)     | 0.4951  |
| Northeast                                                 | 1.23 (-4.67, 7.12)      | 0.6833  |
| Metropolitan service area (reference macropolitan)        |                         |         |
| Metropolitan                                              | -0.11 (-5.77, 5.55)     | 0.9698  |
| Unknown                                                   | 0.60 (-6.87, 8.07)      | 0.8752  |

Note. All factors listed in the table were included in the multivariable model for AIM score change for children with IQ data. P-values arrived at by applying the t-test to coefficient estimates.

Abbreviations: AIM Autism Impact Measure, ASD autism spectrum disorder, IQ intelligence quotient

**Table S7** Sensitivity analysis: Meaningful change thresholds estimated assuming equidistance anchors

| Parameter                                                           | Estimate vs. anchor (95% CI) for improvement (–) or deterioration (+) <sup>a</sup> | R <sup>2</sup> from model | p-value | Spearman’s rho (Parameter vs. CaGI anchor) |
|---------------------------------------------------------------------|------------------------------------------------------------------------------------|---------------------------|---------|--------------------------------------------|
| <b>Anchor: caregiver impression of overall change in ASD</b>        |                                                                                    |                           |         |                                            |
| Total AIM                                                           | 6.50 (4.65, 8.35)                                                                  | 0.017                     | <0.0001 | 0.160                                      |
| AIM Frequency                                                       | 3.04 (2.17, 3.91)                                                                  | 0.018                     | <0.0001 | 0.160                                      |
| AIM Impact                                                          | 3.46 (2.26, 4.65)                                                                  | 0.011                     | <0.0001 | 0.129                                      |
| AIM Repetitive Behavior Domain                                      | 0.64 (0.12, 1.15)                                                                  | 0.002                     | 0.0214  | 0.076                                      |
| AIM Communication Domain                                            | 1.00 (0.64, 1.36)                                                                  | 0.013                     | <0.0001 | 0.133                                      |
| AIM Aberrant Behavior Domain                                        | 1.43 (1.01, 1.86)                                                                  | 0.014                     | <0.0001 | 0.124                                      |
| AIM Social Reciprocity Domain                                       | 0.81 (0.47, 1.15)                                                                  | 0.008                     | <0.0001 | 0.109                                      |
| AIM Peer Interaction Domain                                         | 1.15 (0.82, 1.48)                                                                  | 0.017                     | <0.0001 | 0.135                                      |
| <b>Anchor: caregiver impression of change in communication</b>      |                                                                                    |                           |         |                                            |
| AIM Communication Domain                                            | 1.82 (1.30, 2.33)                                                                  | 0.017                     | <0.0001 | 0.161                                      |
| <b>Anchor: caregiver impression of change in social interaction</b> |                                                                                    |                           |         |                                            |
| AIM Social Reciprocity Domain                                       | 0.79 (0.40, 1.18)                                                                  | 0.006                     | <0.0001 | 0.111                                      |
| AIM Peer Interaction Domain                                         | 1.39 (1.02, 1.77)                                                                  | 0.019                     | <0.0001 | 0.176                                      |

<sup>a</sup>The equidistant sensitivity analysis assumes that the improvement and deterioration anchors are of equal magnitude; the value of the improvement estimate is negative, and the value of the deterioration estimate is positive.

*Note.* The magnitude of the CIR threshold estimates derived in this analysis falls between the magnitude of the Improvement and Deterioration CIR threshold estimates in the primary analysis.

Abbreviations: *AIM* Autism Impact Measure, *ASD* autism spectrum disorder, *CI* confidence interval

**Table S8** Variability of AIM score change for individuals identified by their caregiver as having no overall change in ASD (CaGI-C) at follow-up

| Parameter                                                                   | Median change from baseline (IQR) | Mean change from baseline (SD) |
|-----------------------------------------------------------------------------|-----------------------------------|--------------------------------|
| <b>Anchor: caregiver impression of overall change in ASD (n=527)</b>        |                                   |                                |
| Total AIM                                                                   | -8 (-30, 9)                       | -10.3 (32.1)                   |
| AIM Frequency                                                               | -4 (-12, 6)                       | -3.6 (14.2)                    |
| AIM Impact                                                                  | -5 (-20, 6)                       | -6.7 (21.2)                    |
| AIM Repetitive Behavior Domain                                              | -1 (-7, 4)                        | -1.8 (9.6)                     |
| AIM Communication Domain                                                    | -2 (-6, 1)                        | -2.3 (5.9)                     |
| AIM Aberrant Behavior Domain                                                | -2 (-6, 3)                        | -1.5 (7.5)                     |
| AIM Social Reciprocity Domain                                               | -1 (-5, 3)                        | -1.1 (6.0)                     |
| AIM Peer Interaction Domain                                                 | -1 (-4, 3)                        | -0.8 (5.5)                     |
| <b>Anchor: caregiver impression of change in communication (n=271)</b>      |                                   |                                |
| AIM Communication Domain                                                    | -1 (-5, 2)                        | -1.5 (5.79)                    |
| <b>Anchor: caregiver impression of change in social interaction (n=375)</b> |                                   |                                |
| AIM Social Reciprocity Domain                                               | -1 (-5, 3)                        | -1.0 (5.96)                    |
| AIM Peer Interaction Domain                                                 | 0 (-3, 3)                         | -0.3 (5.45)                    |

*Note.* The median change from baseline during the year for all subjects for whom the caregivers reported no overall change in ASD is slightly negative.

Abbreviations: *AIM* Autism Impact Measure, *ASD* autism spectrum disorder, *CaGI-C* Caregiver-reported Global Impression of Change survey, *IQR* interquartile range, *SD* standard deviation

**Table S9** Sensitivity analysis: anchor-based meaningful change thresholds for improvement based on ROC analysis

| Parameter                                                                     | Improvement change                       |      |             | Improvement % change |                                          |      |             |             |
|-------------------------------------------------------------------------------|------------------------------------------|------|-------------|----------------------|------------------------------------------|------|-------------|-------------|
|                                                                               | Threshold estimate (95% CI) <sup>a</sup> | AUC  | Sensitivity | Specificity          | Threshold estimate (95% CI) <sup>a</sup> | AUC  | Sensitivity | Specificity |
| <b>Primary anchor: caregiver impression of change in overall ASD</b>          |                                          |      |             |                      |                                          |      |             |             |
| Total AIM                                                                     | -7.50 (-14.50, -4.50)                    | 0.57 | 0.59        | 0.53                 | -4.41 (-7.79, -2.41)                     | 0.58 | 0.56        | 0.56        |
| AIM Frequency                                                                 | -3.50 (-4.50, -2.50)                     | 0.57 | 0.56        | 0.54                 | -0.78 (-2.99, -2.53)                     | 0.58 | 0.53        | 0.60        |
| AIM Impact                                                                    | -5.50 (-7.50, -3.50)                     | 0.56 | 0.56        | 0.54                 | -6.46 (-8.51, -5.50)                     | 0.57 | 0.56        | 0.57        |
| AIM Repetitive Behavior Domain                                                | -0.50 (-2.50, -0.50)                     | 0.52 | 0.56        | 0.48                 | -2.90 (-8.91, -2.00)                     | 0.53 | 0.54        | 0.51        |
| AIM Communication Domain                                                      | -2.50 (-3.50, -1.50)                     | 0.55 | 0.50        | 0.56                 | -5.83 (-11.81 -4.60)                     | 0.56 | 0.58        | 0.52        |
| AIM Aberrant Behavior Domain                                                  | -0.50 (-1.50, -0.50)                     | 0.56 | 0.62        | 0.49                 | -2.41 (-7.22, -2.02)                     | 0.57 | 0.61        | 0.51        |
| AIM Social Reciprocity Domain                                                 | -0.50 (-2.50, -0.50)                     | 0.55 | 0.58        | 0.49                 | -2.74 (-8.54, -2.60)                     | 0.55 | 0.58        | 0.50        |
| AIM Peer Interaction Domain                                                   | -1.50 (-1.50, -0.50)                     | 0.57 | 0.51        | 0.61                 | -5.63 (-8.17, -3.51)                     | 0.57 | 0.53        | 0.60        |
| <b>Secondary anchor: caregiver impression of change in communication</b>      |                                          |      |             |                      |                                          |      |             |             |
| AIM Communication Domain                                                      | -1.50 (-2.50, -1.50)                     | 0.59 | 0.57        | 0.56                 | -5.06 (-4.21, -10.47)                    | 0.59 | 0.59        | 0.57        |
| <b>Secondary anchor: caregiver impression of change in social interaction</b> |                                          |      |             |                      |                                          |      |             |             |
| AIM Peer Interaction Domain                                                   | -1.50 (-1.50, -0.50)                     | 0.59 | 0.51        | 0.66                 | -4.12 (-3.92, -5.97)                     | 0.55 | 0.53        | 0.55        |
| AIM Social Reciprocity Domain                                                 | -1.50 (-1.50, 0.50)                      | 0.46 | 0.50        | 0.44                 | -4.65 (-8.76, -2.67)                     | 0.59 | 0.55        | 0.64        |

<sup>a</sup>Empirical confidence interval derived from 5,000 bootstrap samples. Intervals are not bias corrected.

Abbreviations: *AIM* Autism Impact Measure, *ASD* autism spectrum disorder, *AUC* area under the curve, *CI* confidence interval, *ROC* receiver operator characteristic

**Table S10** Anchor-based meaningful change thresholds for deterioration based on ROC analysis

|                                                                               | Deterioration change                     |      |             |             | Deterioration % change                   |      |             |             |
|-------------------------------------------------------------------------------|------------------------------------------|------|-------------|-------------|------------------------------------------|------|-------------|-------------|
| Parameter                                                                     | Threshold estimate (95% CI) <sup>a</sup> | AUC  | Sensitivity | Specificity | Threshold estimate (95% CI) <sup>a</sup> | AUC  | Sensitivity | Specificity |
| <b>Primary anchor: caregiver impression of change in overall ASD</b>          |                                          |      |             |             |                                          |      |             |             |
| Total AIM                                                                     | 10.50 (4.50, 11.5)                       | 0.61 | 0.65        | 0.53        | 4.08 (2.04, 5.49)                        | 0.62 | 0.65        | 0.56        |
| AIM Frequency                                                                 | 2.50 (0.50, 8.50)                        | 0.61 | 0.61        | 0.57        | 1.71 (0.72, 7.39)                        | 0.62 | 0.61        | 0.59        |
| AIM Impact                                                                    | 5.50 (1.50, 7.50)                        | 0.59 | 0.58        | 0.55        | 5.95 (3.93, 8.50)                        | 0.60 | 0.63        | 0.55        |
| AIM Repetitive Behavior Domain                                                | -1.50 (-2.50, 2.50)                      | 0.54 | 0.42        | 0.66        | 7.85 (3.31, 9.20)                        | 0.56 | 0.68        | 0.43        |
| AIM Communication Domain                                                      | 1.50 (-0.50, 1.50)                       | 0.58 | 0.57        | 0.57        | 4.49 (3.39, 7.62)                        | 0.59 | 0.56        | 0.59        |
| AIM Aberrant Behavior Domain                                                  | 0.50 (-0.50, 0.50)                       | 0.60 | 0.58        | 0.60        | 2.15 (0.94, 6.09)                        | 0.61 | 0.59        | 0.60        |
| AIM Social Reciprocity Domain                                                 | 0.50 (-0.50, 2.50)                       | 0.57 | 0.53        | 0.57        | 3.18 (1.11, 8.76)                        | 0.57 | 0.55        | 0.56        |
| AIM Peer Interaction Domain                                                   | 0.50 (-0.50, -1.50)                      | 0.61 | 0.58        | 0.56        | 4.08 (3.51, 8.17)                        | 0.60 | 0.63        | 0.54        |
| <b>Secondary anchor: caregiver impression of change in communication</b>      |                                          |      |             |             |                                          |      |             |             |
| AIM Communication Domain                                                      | 1.50 (0.50, -1.50)                       | 0.58 | 0.57        | 0.57        | 4.48 (3.39, 7.62)                        | 0.59 | 0.56        | 0.59        |
| <b>Secondary anchor: caregiver impression of change in social interaction</b> |                                          |      |             |             |                                          |      |             |             |
| AIM Peer Interaction Domain                                                   | 0.50 (-1.50, 1.50)                       | 0.61 | 0.58        | 0.56        | 3.18 (-3.51, 8.17)                       | 0.67 | 0.55        | 0.56        |
| AIM Social Reciprocity Domain                                                 | 0.50 (-2.50, 0.50)                       | 0.57 | 0.53        | 0.57        | 4.08 (2.67, 8.76)                        | 0.60 | 0.63        | 0.54        |

<sup>a</sup>Empirical confidence interval derived from 5,000 bootstrap samples. Intervals are not bias corrected.

Abbreviations: *AIM* Autism Impact Measure, *ASD* autism spectrum disorder, *AUC* area under the curve, *CI* confidence interval, *ROC* receiver operator characteristic

**Fig. S1 Change in AIM frequency score (a), impact score (b), and repetitive behavior domain score (c) versus the primary anchor (overall caregiver impression of change)**

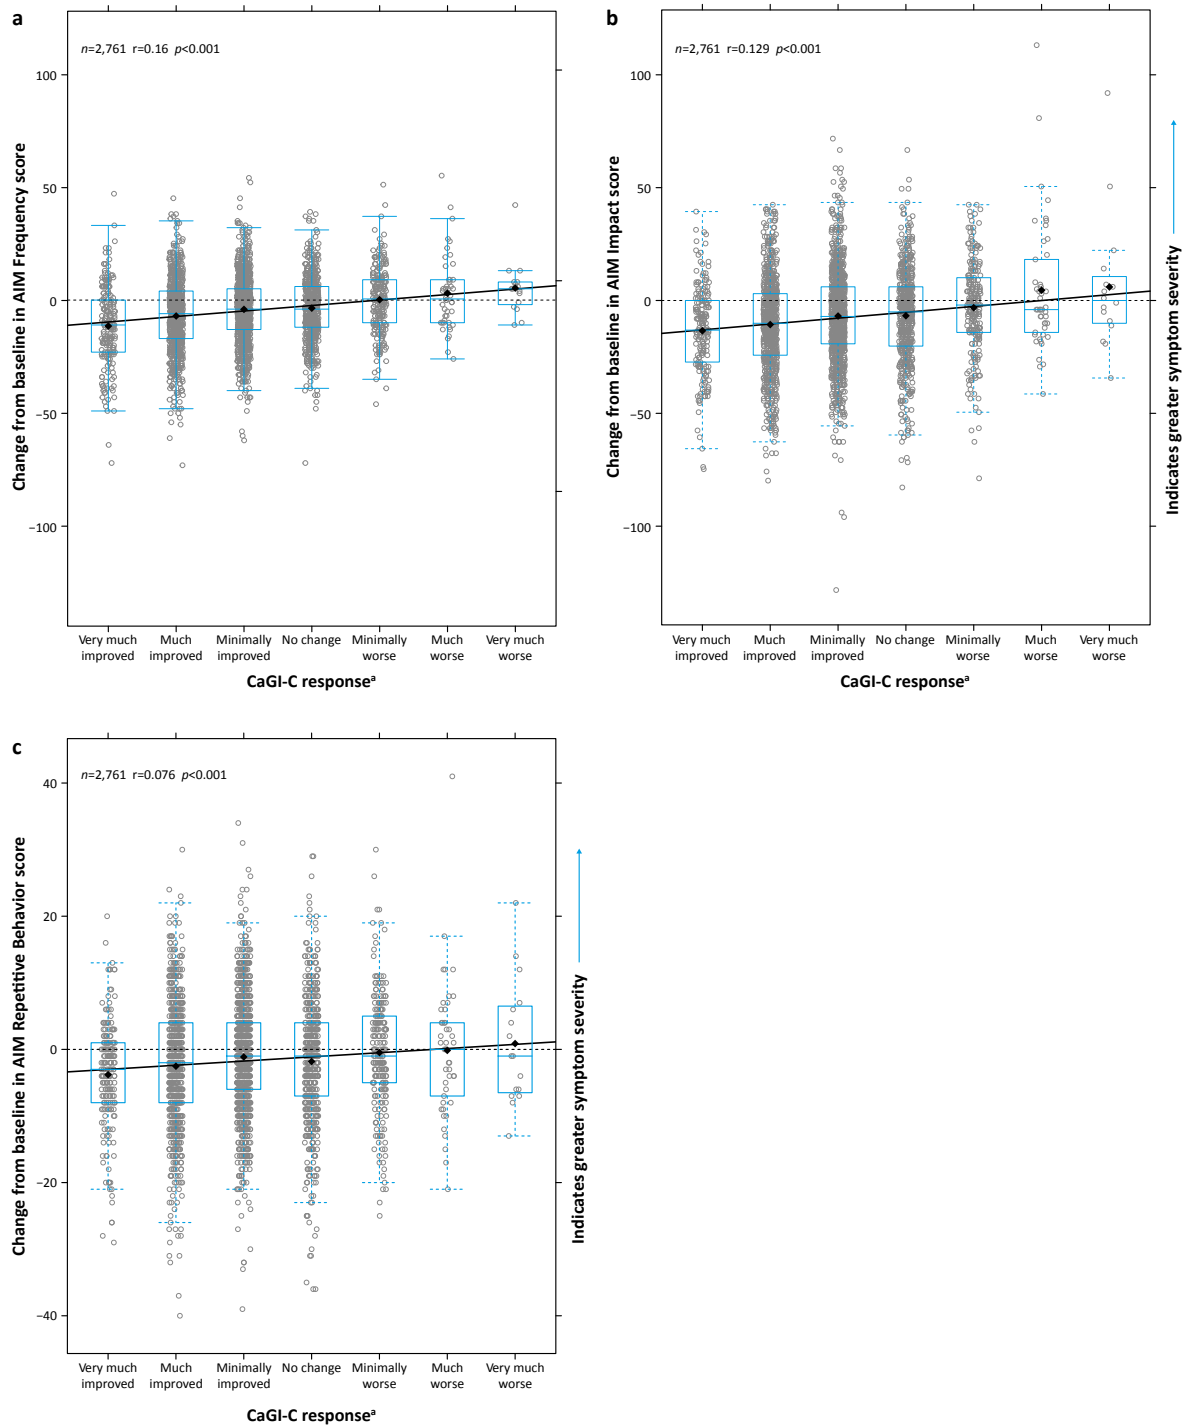

<sup>a</sup>Response to question ‘Please indicate how much change your child has experienced between 12 months ago and today in his/her overall autism.’

Note. Possible score ranges for AIM frequency and impact dimensions are 41–205. Possible score range for AIM repetitive behavior domain is 16–80.

Abbreviations: AIM Autism Impact Measure, CaGI-C caregiver global impressions of change survey

**Fig. S2** Change in AIM communication domain score (a), atypical behavior domain score (b), social reciprocity domain score (c), and peer interaction score (d) versus the primary anchor (overall caregiver impression of change)

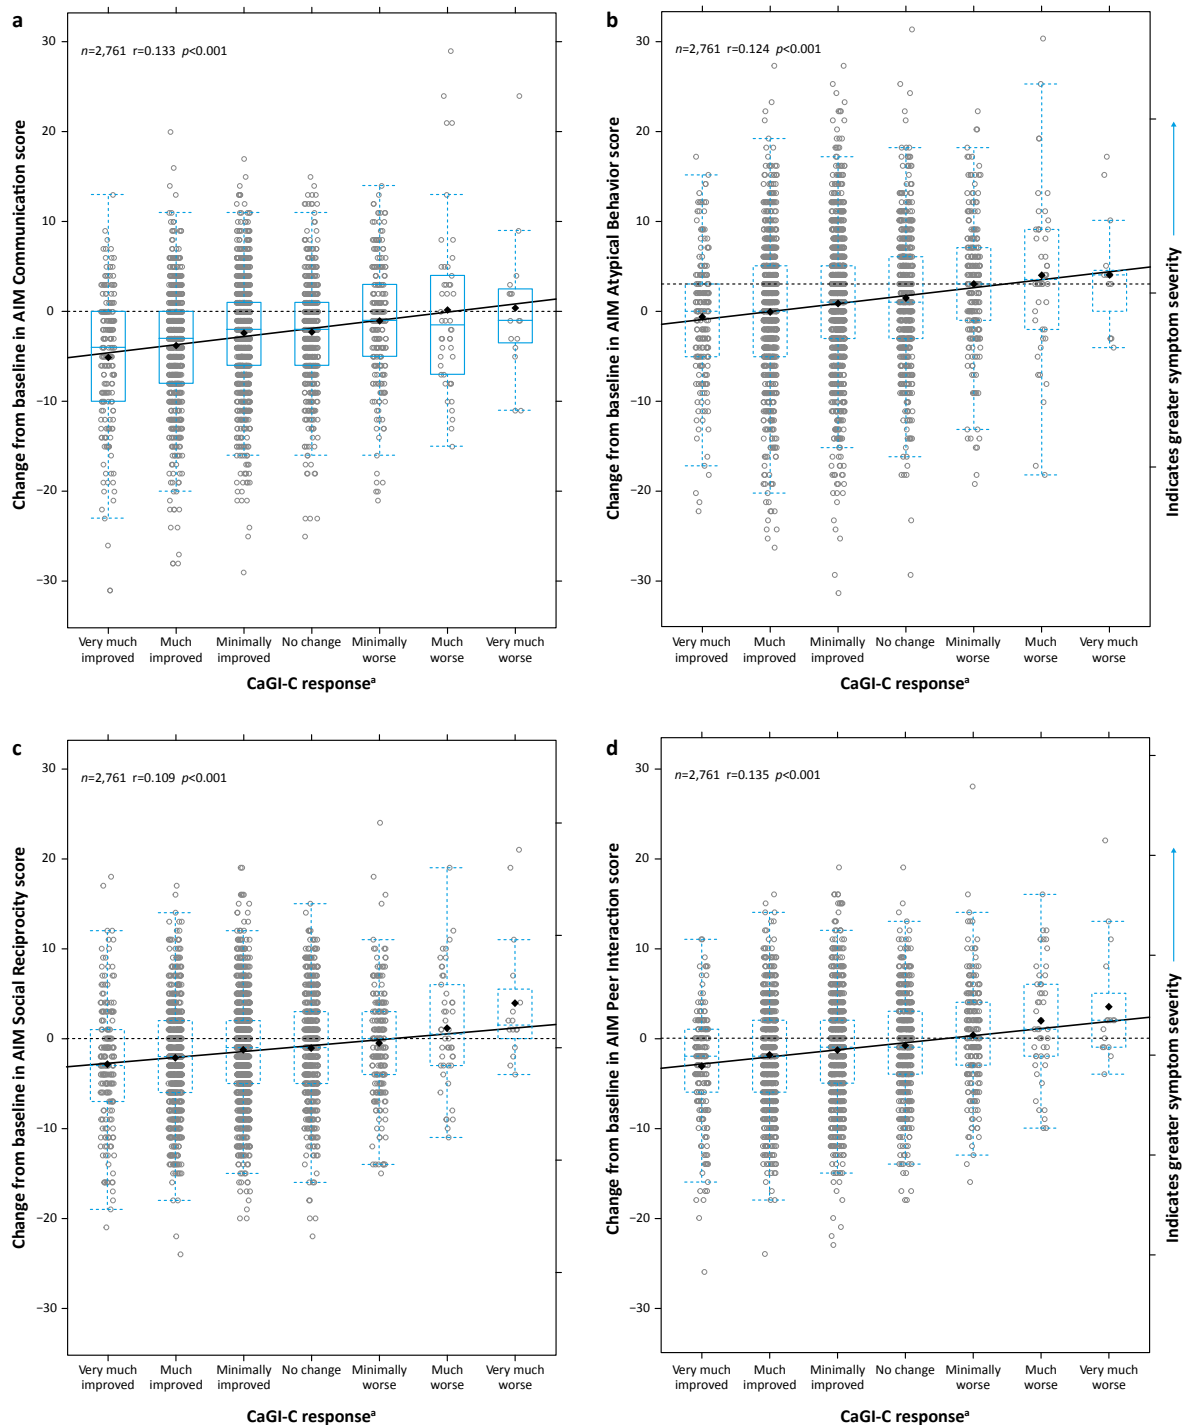

<sup>a</sup>Response to question 'Please indicate how much change your child has experienced between 12 months ago and today in his/her overall autism.'  
 Note. Possible score ranges for AIM domains are 12–60 for communication, 12–60 for atypical behavior, 10–50 for social reciprocity, and 8–40 for peer interaction.  
 Abbreviations: AIM Autism Impact Measure, CaGI-C caregiver global impressions of change survey

**Fig. S3 Change in AIM communication domain score versus the communication secondary anchor (overall caregiver impression of change)**

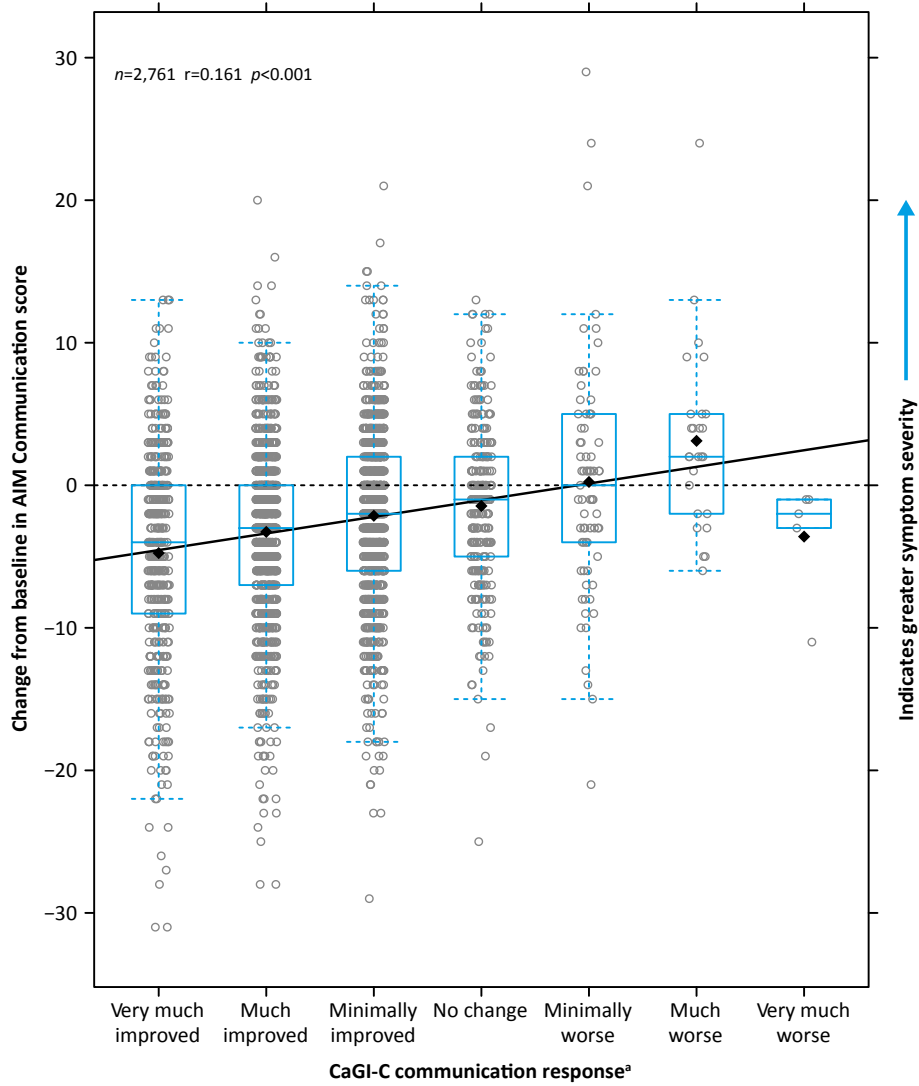

<sup>a</sup>Response to question ‘Please indicate how much change your child has experienced between 12 months ago and today in his/her communication with other people (e.g., speaking, listening and paying attention, understanding emotions of others, writing).’

*Note.* Possible score ranges for AIM communication domain is 12–60.

Abbreviations: *AIM* Autism Impact Measure, *CaGI-C* caregiver global impressions of change survey



**Fig. S4 Change in AIM social reciprocity domain score (a) and peer interaction domain score (b) versus the social interaction secondary anchor (overall caregiver impression of change)**

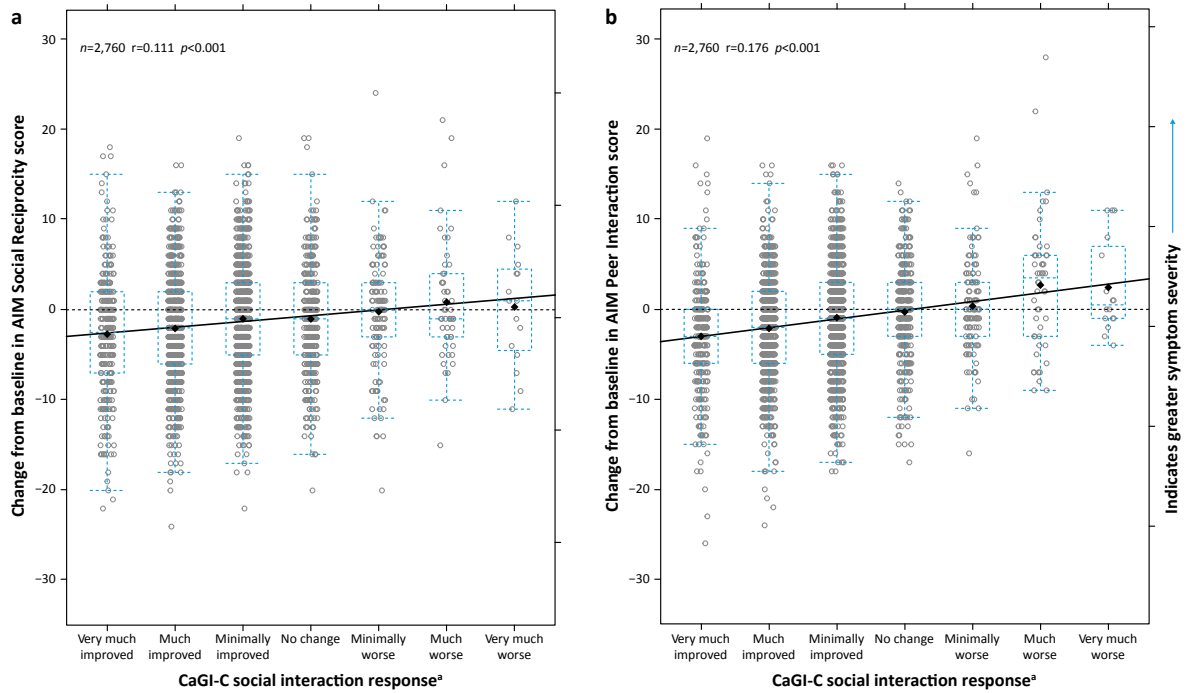

<sup>a</sup>Response to question ‘Please indicate how much change your child has experienced between 12 months ago and today in his/her social interaction with other people (e.g., getting along with others, socializing, coping in group situations).’

*Note.* Possible score ranges for AIM domains are 10–50 for social reciprocity and 8–40 for peer interaction. Abbreviations: *AIM* Autism Impact Measure, *CaGI-C* caregiver global impressions of change survey

**Fig. S5 AIM domain scores versus caregiver impression of severity**

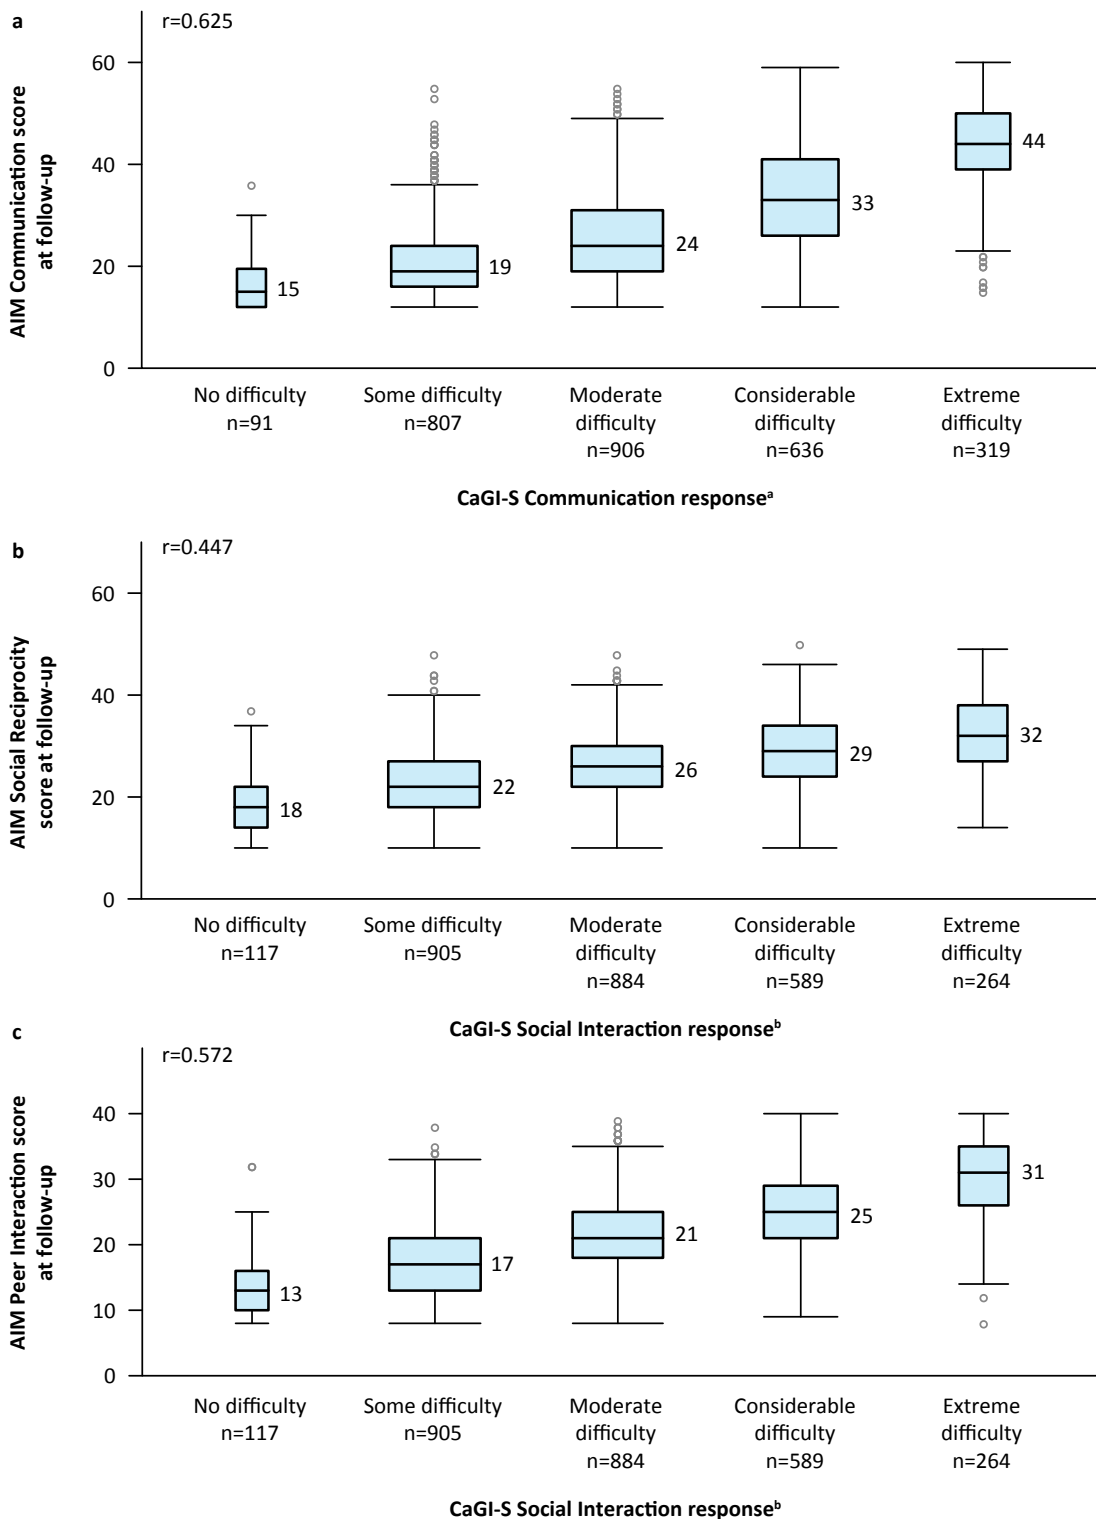

<sup>a</sup>Response to question ‘Please tell us how much difficulty your child has experienced in the past two weeks in his/her communication with other people (e.g., speaking, listening and paying attention, understanding emotions of others, writing).’

<sup>b</sup>Response to question ‘Please tell us how much difficulty your child has experienced in the past two weeks in his/her social interaction with other people (e.g., getting along with others, socializing, coping in group situations).’

*Note.* Possible score ranges for AIM domains are 12–60 for communication, 10–50 for social reciprocity, and 8–40 for peer interaction.

Abbreviations: *AIM* Autism Impact Measure, *CaGI-S* caregiver global impressions of severity survey

**Fig. S6 Primary and secondary anchor-based within-person meaningful percent change thresholds for improvement and deterioration**

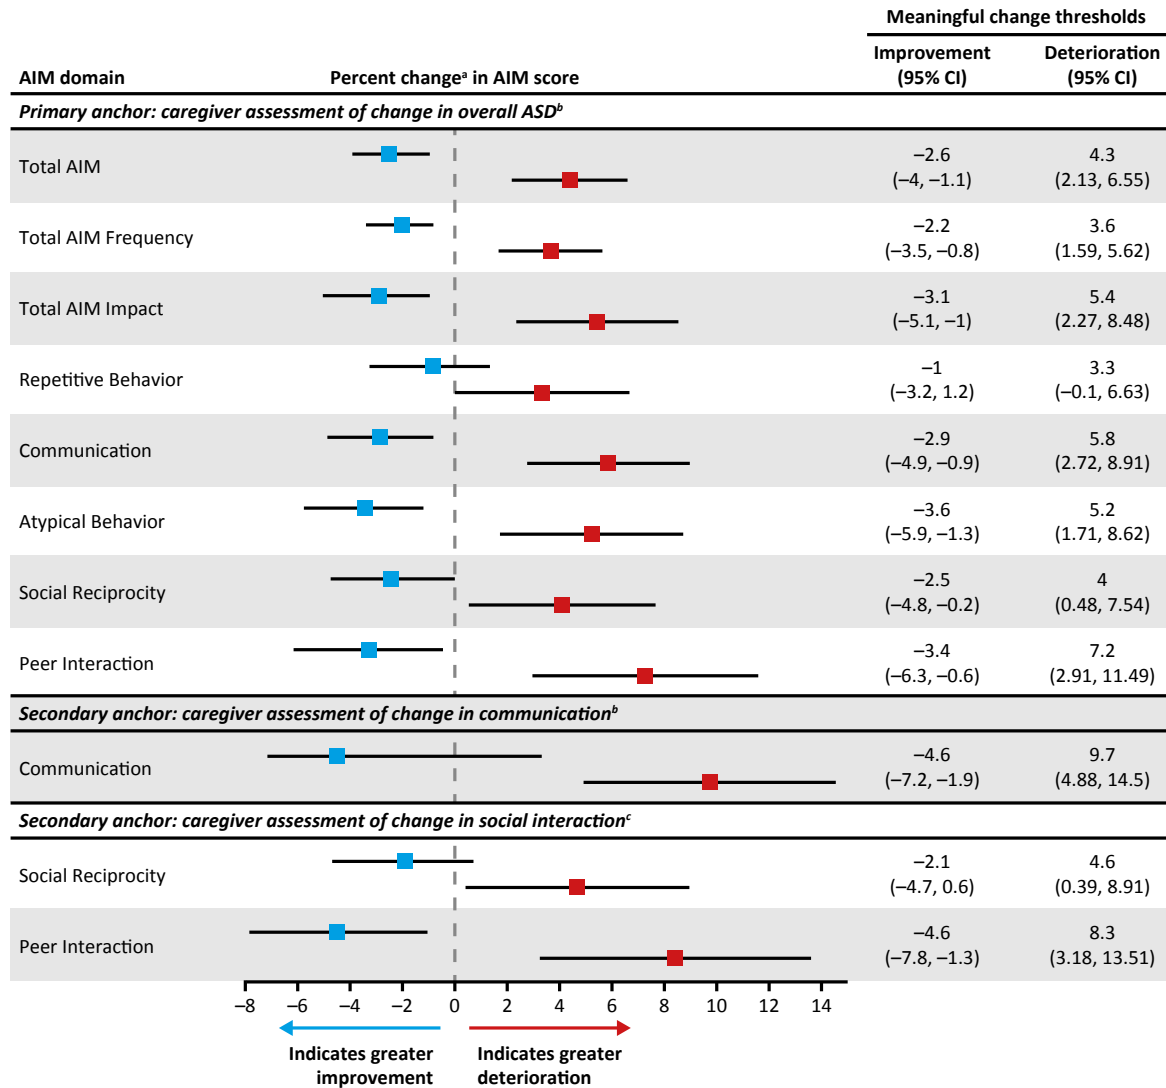

<sup>a</sup>Percent change relative to the baseline value

<sup>b</sup>N=2,761

<sup>c</sup>n=2,760

Abbreviations: AIM Autism Impact Measure, ASD autism spectrum disorder, CI confidence interval

**Fig. S7 Primary and secondary anchor-based within-person meaningful change thresholds for much improvement and much deterioration**

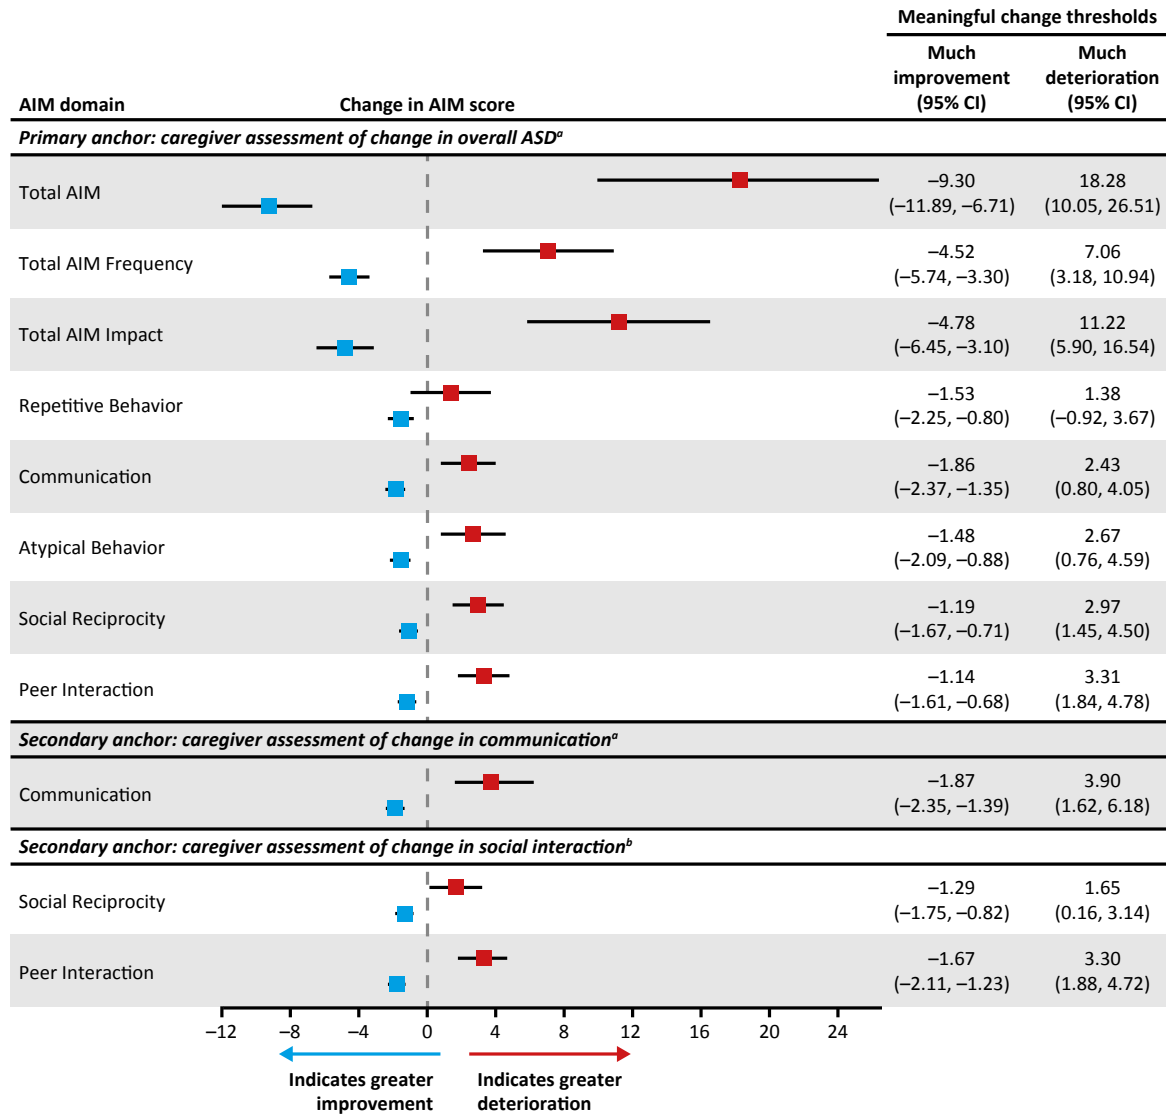

<sup>a</sup>N=2,761

<sup>b</sup>n=2,760

Abbreviations: AIM Autism Impact Measure, ASD autism spectrum disorder, CI confidence interval

**Fig. S8 Primary and secondary anchor-based within-person meaningful percent change thresholds for much improvement and much deterioration**

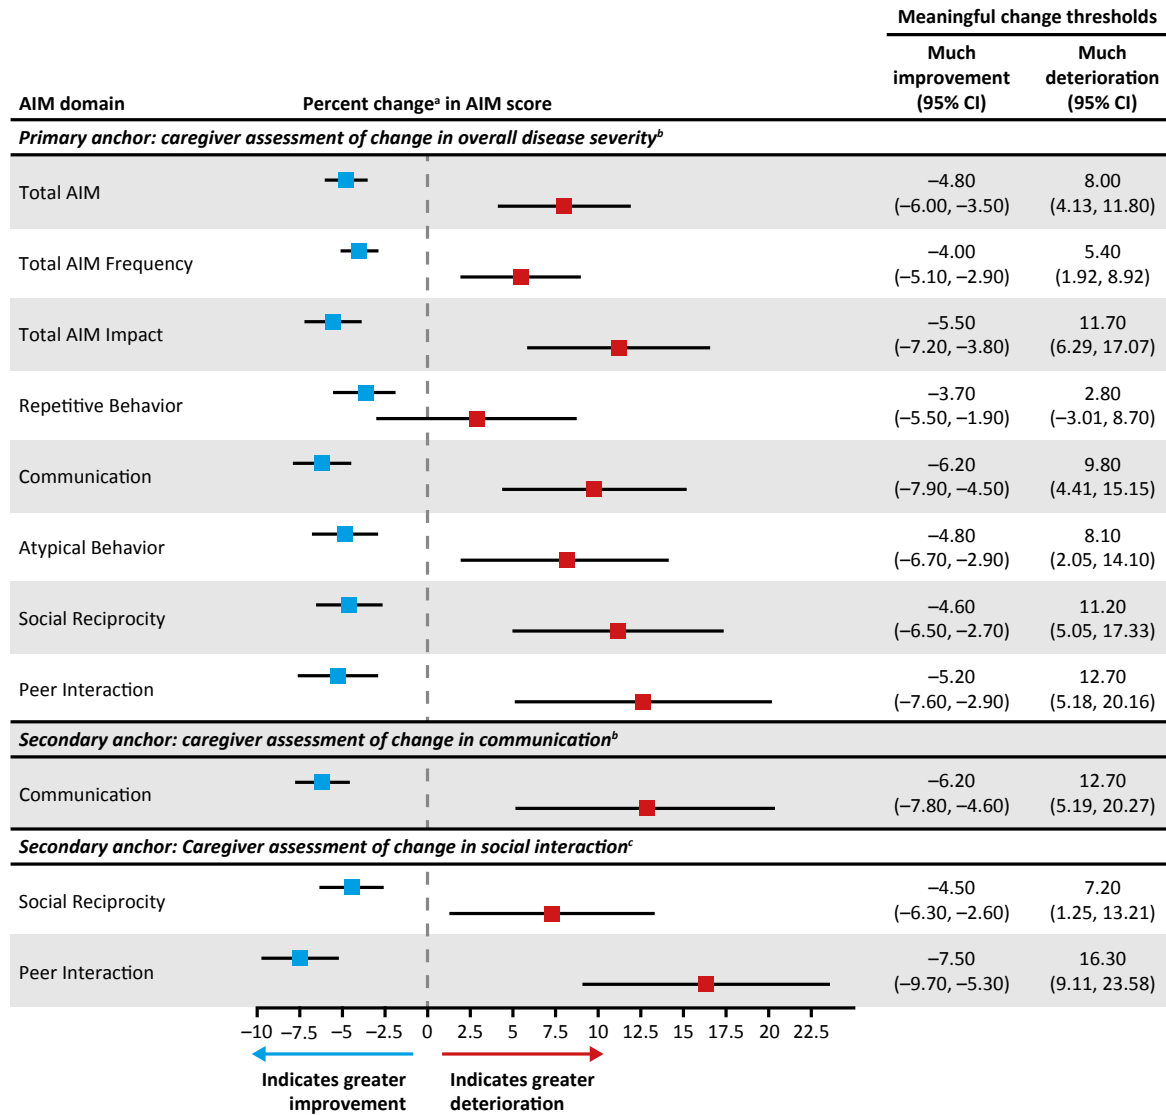

<sup>a</sup>Percent change relative to the baseline value

<sup>b</sup>N=2,761

<sup>c</sup>n=2,760

Abbreviations: AIM Autism Impact Measure, ASD autism spectrum disorder, CI confidence interval
